# Supplementary material for: Phylogenetic review of tonal sound production in whales in relation to sociality
Source: PubMed Central journal article supplement (PMC2000896; doi:10.1186/1471-2148-7-136), 2007-08-10
Supplement: 1471-2148-7-136-S1.pdf [file 1471-2148-7-136-S1.pdf]

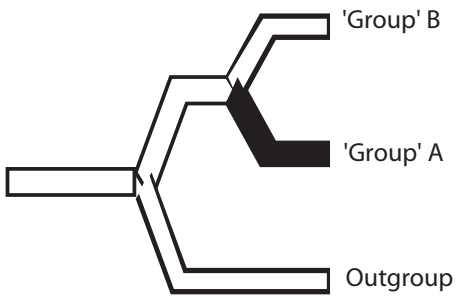

**a. Optimization of Snorts**

Present  
 Absent

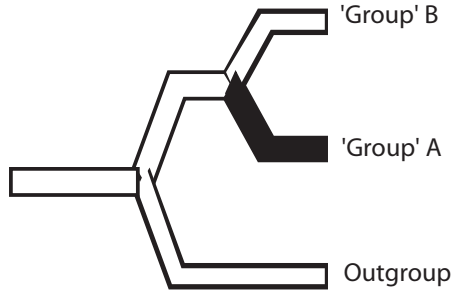

**b. Optimization of frequency**

7-10 kHz  
 12-15 kHz

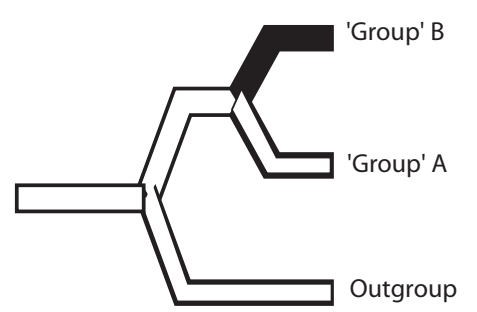

**c. Optimization of inflection points**

2 inflection points  
 3 inflection points
