# Supplementary material for: Phylogenetic review of tonal sound production in whales in relation to sociality
Source: PubMed Central journal article supplement (PMC2000896; doi:10.1186/1471-2148-7-136), 2007-08-10
Supplement: 1471-2148-7-136-S2.pdf [file 1471-2148-7-136-S2.pdf]

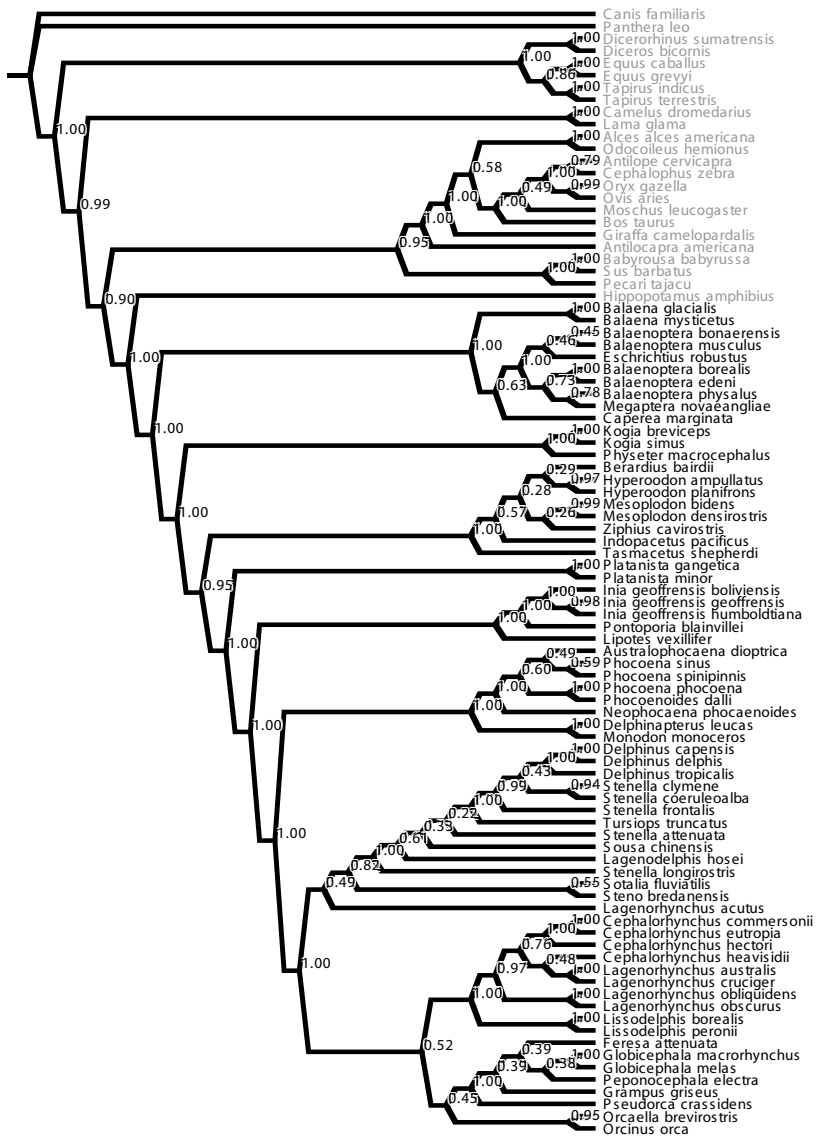

Mysticeti

Physiteroidea

Ziphiidae

Platanistidae

Inoidea

Lipotidae

Phocoenidae

Monodontidae

Delphinidae

- Canis familiaris
- Panthera leo
- Diceros bicornis
- Equus caballus
- Equus grevyi
- Tapirus indicus
- Tapirus terrestris
- Camelus dromedarius
- Lama glama
- Alces alces americana
- Odocoileus hemionus
- Antelope cervicapra
- Cephalophus zebra
- Oryx gazella
- Ovis aries
- Moschus leucogaster
- Bos taurus
- Giraffa camelopardalis
- Antilocapra americana
- Babryrousa babyrousa
- Sus barbatus
- Pecari tajacu
- Hippopotamus amphibius
- Balaena glacialis
- Balaena mysticetus
- Balaenoptera bonaerensis
- Balaenoptera musculus
- Eschrichtius robustus
- Balaenoptera borealis
- Balaenoptera edeni
- Balaenoptera physalus
- Megaptera novaeangliae
- Caperea marginata
- Kogia breviceps
- Kogia simus
- Physeter macrocephalus
- Berardius bairdii
- Hyperoodon ampullatus
- Hyperoodon planifrons
- Mesoplodon bidens
- Mesoplodon densirostris
- Ziphius cavirostris
- Indopacetus pacificus
- Tasmacetus shepherdi
- Platanista gangetica
- Platanista minor
- Inia geoffrensis boliviensis
- Inia geoffrensis geoffrensis
- Inia geoffrensis humboldtiana
- Pontoporia blainvilliei
- Lipotes vexillifer
- Australophocaena dioptrica
- Phocoena sinus
- Phocoena spinipinnis
- Phocoena phocoena
- Phocoenoides dalli
- Neophocaena phocaenoides
- Delphinapterus leucas
- Monodon monoceros
- Delphinus capensis
- Delphinus delphis
- Delphinus tropicalis
- Stenella clymene
- Stenella coeruleoalba
- Stenella frontalis
- Tursiops truncatus
- Stenella attenuata
- Sousa chinensis
- Lagenodelphis hosei
- Stenella longirostris
- Stotalia fluviatilis
- Steno bredanensis
- Lagenorhynchus acutus
- Cephalorhynchus commersonii
- Cephalorhynchus eutropia
- Cephalorhynchus hectori
- Cephalorhynchus heavisidii
- Lagenorhynchus australis
- Lagenorhynchus cruciger
- Lagenorhynchus obliquidens
- Lagenorhynchus obscurus
- Lissodelphis borealis
- Lissodelphis peronii
- Feresa attenuata
- Globicephala macrorhynchus
- Globicephala melas
- Eponocephala electra
- Grampus griseus
- Pseudorca crassidens
- Orcaella brevirostris
- Orcinus orca
