# Supplementary material for: Phylogenetic review of tonal sound production in whales in relation to sociality
Source: PubMed Central journal article supplement (PMC2000896; doi:10.1186/1471-2148-7-136), 2007-08-10
Supplement: 1471-2148-7-136-S3.pdf [file 1471-2148-7-136-S3.pdf]

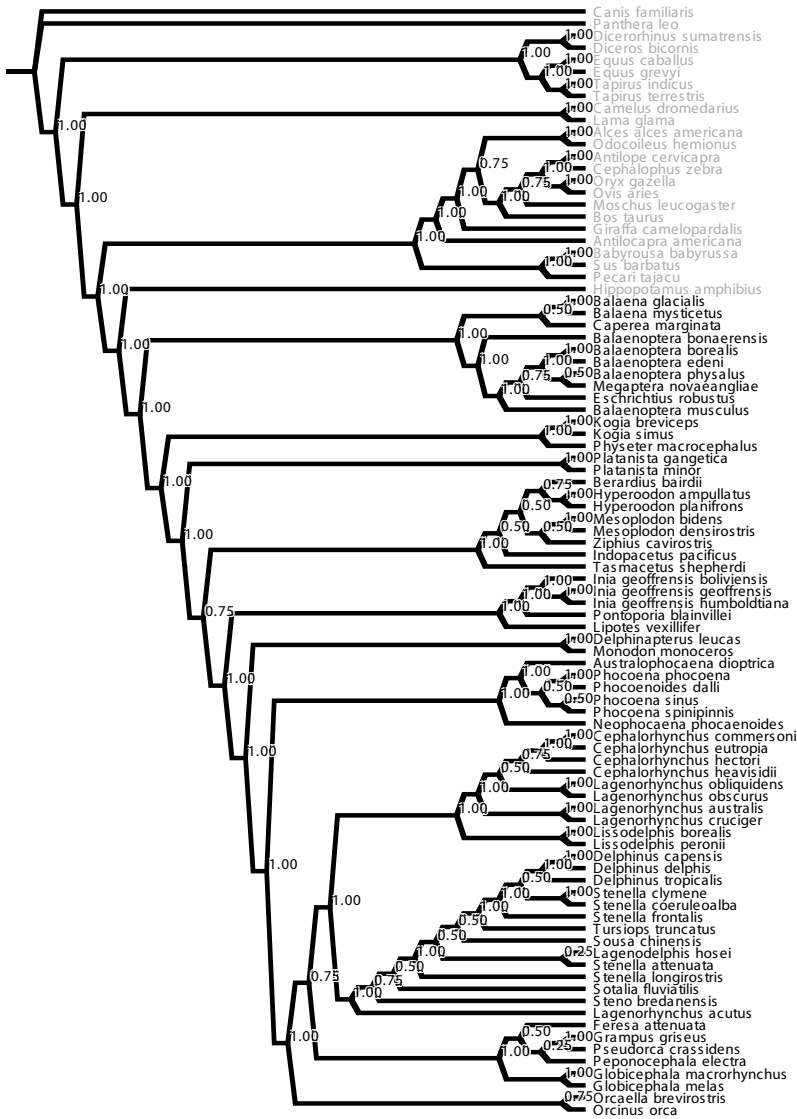

Mysticeti

Physiteroidea

Platanistidae

Ziphiidae

Inoidea

Lipotidae

Monodontidae

Phocoenidae

Delphinidae

- Canis familiaris*
- Cantheria leo*
- Dicerorhinus sumatrensis*
- Diceros bicornis*
- Equus caballus*
- Equus greyl*
- Tapirus indicus*
- Tapirus terrestris*
- Camelus dromedarius*
- Lama glama*
- Alces alces americana*
- Odocoileus hemionus*
- Antelope cervicapra*
- Cephalophus zebra*
- Oryx gazella*
- Ovis aries*
- Moschus leucogaster*
- Bos taurus*
- Giraffa camelopardalis*
- Antilocapra americana*
- Ababyrousa babyrousa*
- Ababyrousa barbatulus*
- Pecari tajacu*
- Hippopotamus amphibius*
- Balaena glacialis*
- Balaena mysticetus*
- Caperea marginata*
- Balaenoptera bonaerensis*
- Balaenoptera borealis*
- Balaenoptera edeni*
- Balaenoptera physalus*
- Megaptera novaengliae*
- Eschrichtius robustus*
- Balaenoptera musculus*
- Kogia breviceps*
- Kogia simus*
- Physeter macrocephalus*
- Platanista gangetica*
- Platanista minor*
- Berardius bairdii*
- Hyperoodon ampullatus*
- Hyperoodon plahifrons*
- Mesoplodon bidens*
- Mesoplodon densirostris*
- Ziphius cavirostris*
- Indopacetus pacificus*
- Tasmacetus shepherdi*
- Inia geoffrensis boliviensis*
- Inia geoffrensis geoffrensis*
- Inia geoffrensis humboldtiana*
- Pontoporia blainvilliei*
- Lipotes vexillifer*
- Delphinapterus leucas*
- Monodon monoceros*
- Australophocaena dioptrica*
- Phocoena phocaena*
- Phocoenoides dalli*
- Phocoena sinus*
- Phocoena spinipinnis*
- Neophocaena phocaenoides*
- Cephalorhynchus commersonii*
- Cephalorhynchus eutropia*
- Cephalorhynchus hectori*
- Cephalorhynchus heavisidii*
- Lagenorhynchus obliquidens*
- Lagenorhynchus obscurus*
- Lagenorhynchus australis*
- Lagenorhynchus cruciger*
- Lisiodelphis borealis*
- Lisiodelphis peronii*
- Delphinus ca pensis*
- Delphinus delphis*
- Delphinus tropicalis*
- Stenella clymene*
- Stenella coeruleoalba*
- Stenella frontalis*
- Tursiops truncatus*
- Sousa chinensis*
- Lagenodelphis hosei*
- Stenella attenuata*
- Stenella longirostris*
- Sotalia fluviatilis*
- Steno bredanensis*
- Lagenorhynchus acutus*
- Feresa attenuata*
- Grampus griseus*
- Pseudorca crassidens*
- Peponocephala electra*
- Globicephala macrorhynchus*
- Globicephala melas*
- Orcaella brevirostris*
- Orca orca*
