# Supplementary material for: Phylogenetic review of tonal sound production in whales in relation to sociality
Source: PubMed Central journal article supplement (PMC2000896; doi:10.1186/1471-2148-7-136), 2007-08-10

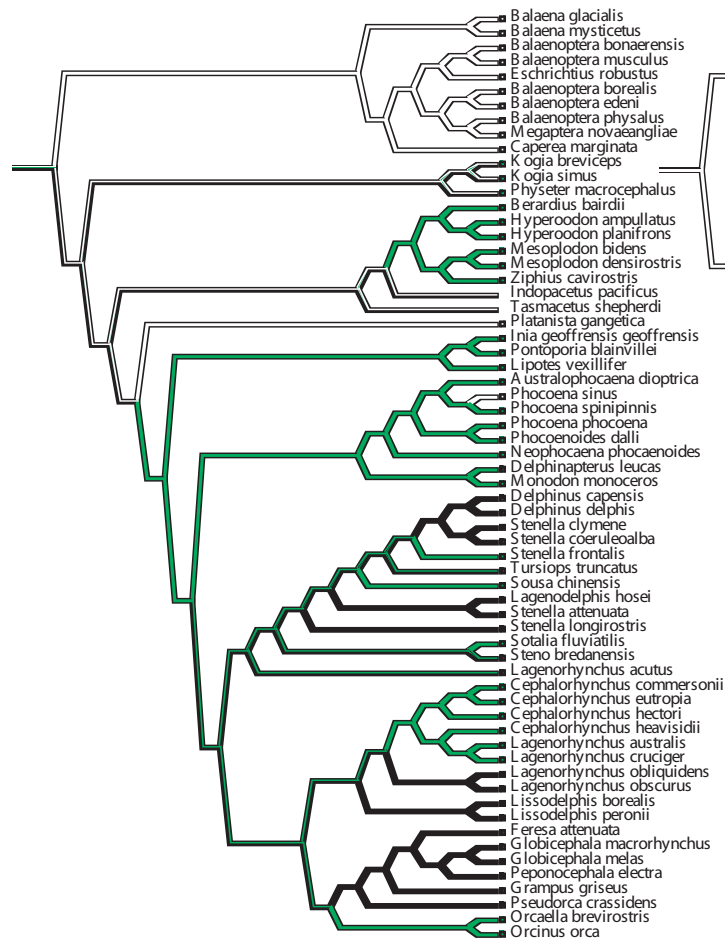

a. Group Size

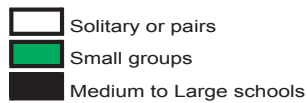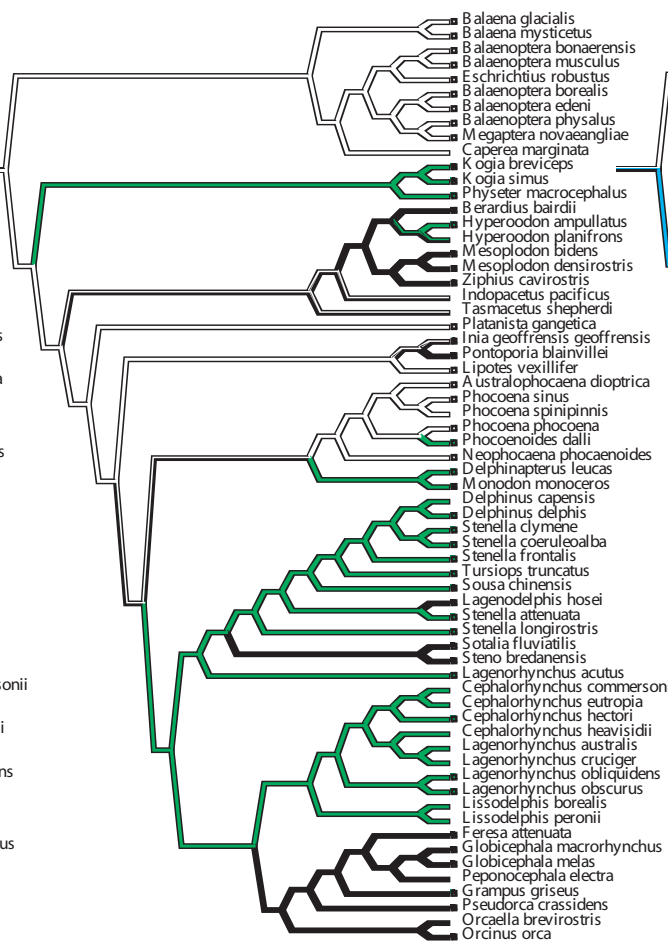

b. Group Composition

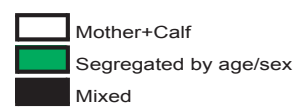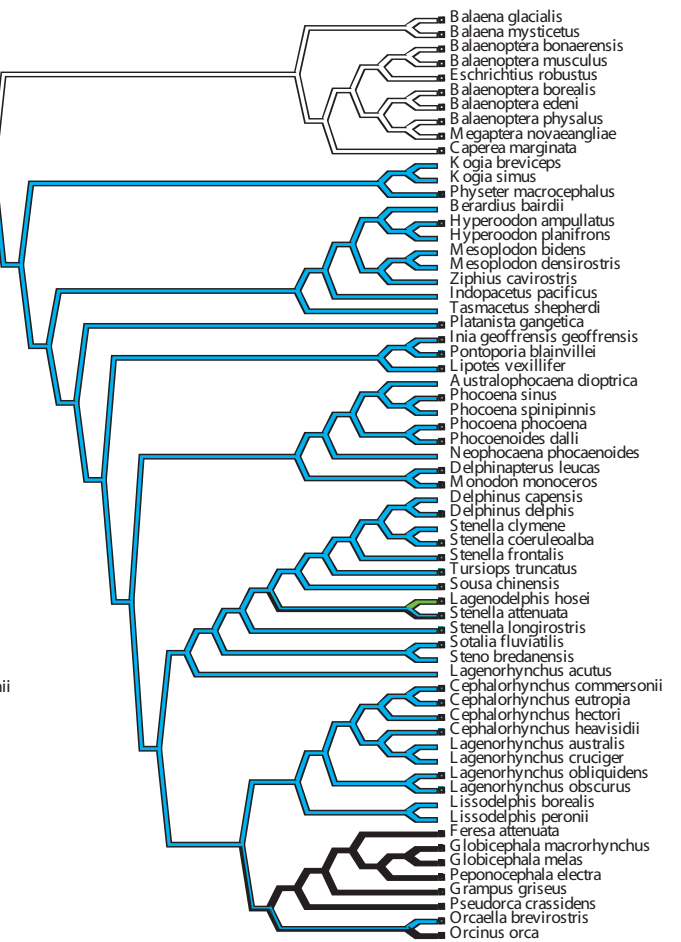

c. Group Stability/Associations

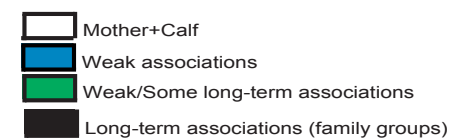

Supplement: 1471-2148-7-136-S6.pdf [file 1471-2148-7-136-S6.pdf]
