# Supplementary material for: Phylogenetic review of tonal sound production in whales in relation to sociality
Source: PubMed Central journal article supplement (PMC2000896; doi:10.1186/1471-2148-7-136), 2007-08-10
Supplement: 1471-2148-7-136-S8.pdf [file 1471-2148-7-136-S8.pdf]

p=0.03 (6Gains,2Losses)

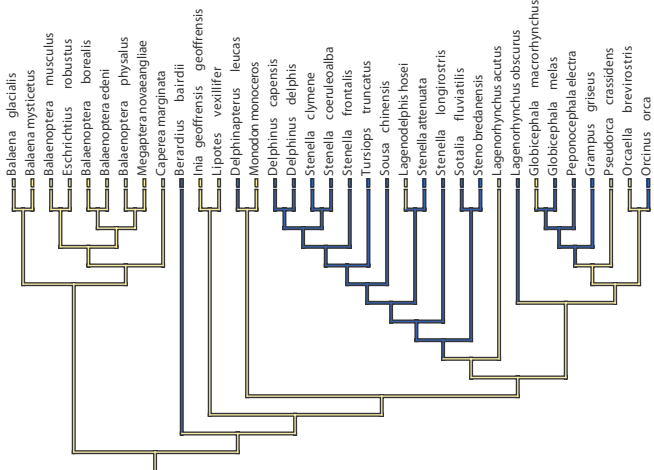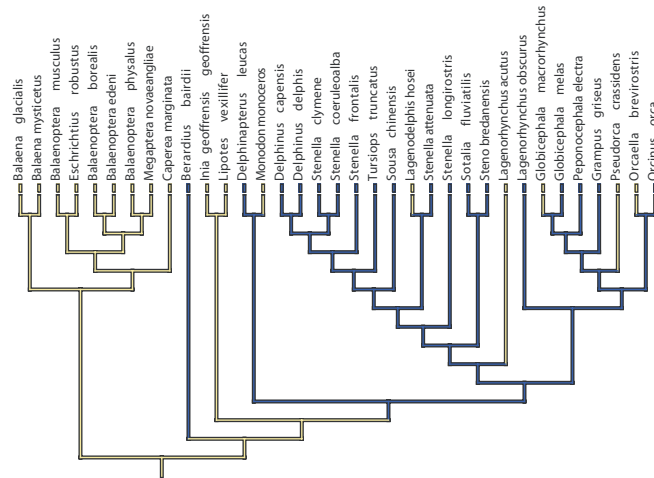

p=0.03 (2Gains,6Losses)

p=0.04 (4Gains,4Losses)

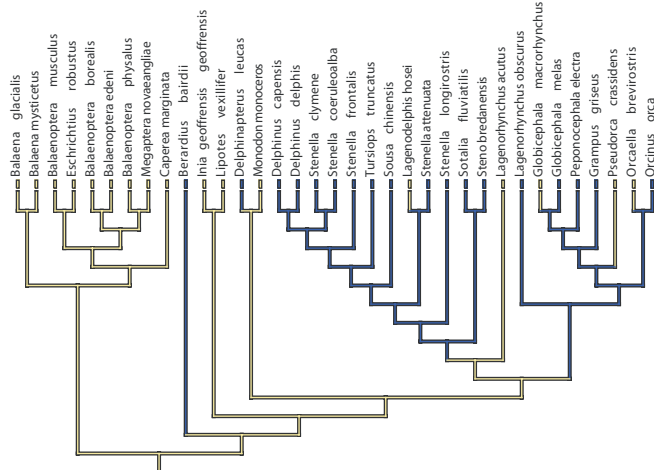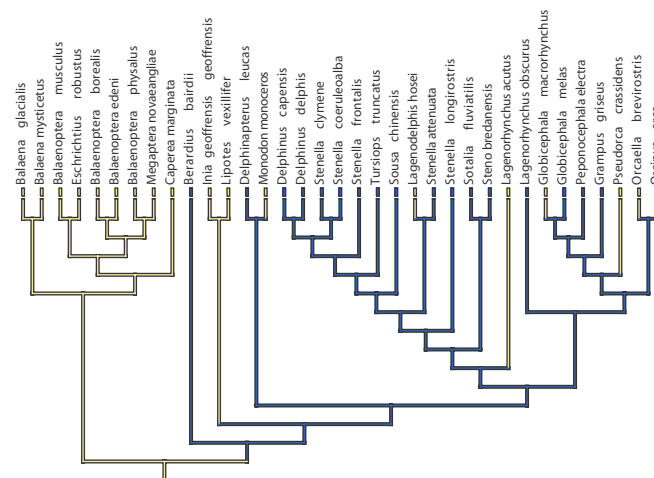

p=0.14(1Gain,7Losses)

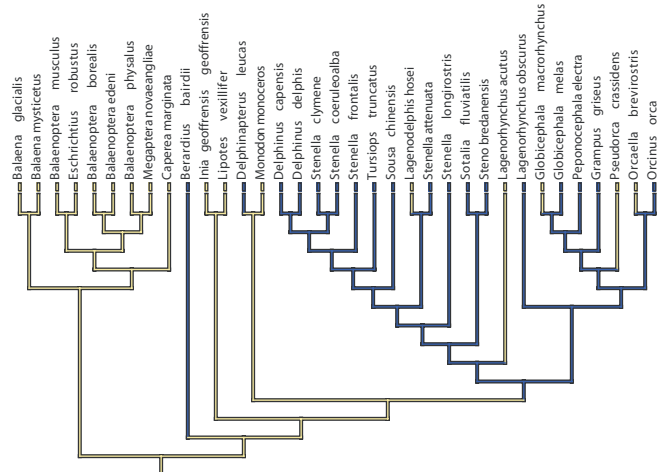

p=0.05(3Gains,5Losses)
